# Supplementary material
Source: publisher site journal article supplement (https://www.spandidos-publications.com/8206/downloadSupplementary)
Supplement: Supplementary file 1 [file downloadSupplementary]

**Table SIII.** Quality assessment of included studies based on the QUADAS-2 tool.

| First author/s,<br>year                 | Risk of bias      |            |                    |                 | Applicability concerns |            |                    | Justification                                            | (Refs.) |
|-----------------------------------------|-------------------|------------|--------------------|-----------------|------------------------|------------|--------------------|----------------------------------------------------------|---------|
|                                         | Patient selection | Index test | Reference standard | Flow and timing | Patient selection      | Index test | Reference standard |                                                          |         |
| Menéndez-Valladares <i>et al</i> , 2015 | H                 | L          | L                  | L               | L                      | L          | L                  | Predefined HbA1c ranges; potential selection bias        | (26)    |
| Criel <i>et al</i> , 2016               | H                 | L          | L                  | L               | L                      | L          | L                  | Predefined HbA1c ranges; potential selection bias        | (11)    |
| Grant <i>et al</i> , 2017               | L                 | L          | L                  | L               | L                      | L          | L                  | Consecutive sampling; low risk of selection bias         | (12)    |
| Wang <i>et al</i> , 2018                | L                 | L          | L                  | L               | L                      | L          | L                  | Consecutive sampling; low risk of selection bias         | (27)    |
| Dupuy <i>et al</i> , 2019               | UR                | L          | L                  | L               | L                      | L          | L                  | Sampling procedure not reported; unclear selection bias  | (28)    |
| Dubach <i>et al</i> , 2019              | L                 | L          | L                  | L               | L                      | L          | L                  | Consecutive sampling; low risk of selection bias         | (29)    |
| Guadalupe Vargas <i>et al</i> , 2020    | UR                | L          | L                  | L               | L                      | L          | L                  | Sampling procedure not reported; unclear selection bias  | (30)    |
| Şahingöz Erdal <i>et al</i> , 2019      | H                 | L          | L                  | L               | L                      | L          | L                  | Selected clinical population; limited representativeness | (31)    |
| Toro-Crespo <i>et al</i> , 2017         | H                 | L          | L                  | L               | L                      | L          | L                  | Predefined HbA1c ranges; potential selection bias        | (32)    |
| Rathod <i>et al</i> , 2024              | L                 | L          | L                  | L               | L                      | L          | L                  | Consecutive sampling; low risk of selection bias         | (33)    |
| Saxton <i>et al</i> , 2018              | L                 | L          | L                  | L               | L                      | L          | L                  | Consecutive sampling; low risk of selection bias         | (34)    |

Risk of bias was assessed across four domains: Patient selection, index test, reference standard, and flow and timing. Patient selection was the primary source of potential bias, with several studies judged as high or unclear risk due to the use of predefined HbA1c ranges, recruitment from specific clinical populations, or insufficient reporting of sampling procedures. By contrast, the domains of index test, reference standard, and flow and timing were generally judged as low risk, reflecting standardized execution of POC testing, consistent use of HPLC as the reference standard, and appropriate timing between index and reference measurements without differential verification. Applicability concerns were considered low across studies, as the target populations, index tests, and reference standards were aligned with the objectives of this review. HbA1c, hemoglobin A1c; POC, point-of-care; HPLC, high-performance liquid chromatography; H, high risk; L, low risk; UR, unclear risk, based on QUADAS-2 risk assessment.

**Table SIII.** Characteristics and numeric outcomes of included studies.

| <b>First author/s, year</b>             | <b>POC device</b> | <b>Comparator device</b> | <b>Specimen type</b> | <b>Study Setting</b>                 | <b>MD</b> | <b>LoA</b>    | <b>Funding source</b> | <b>(Refs.)</b> |
|-----------------------------------------|-------------------|--------------------------|----------------------|--------------------------------------|-----------|---------------|-----------------------|----------------|
| Menéndez-Valladares <i>et al</i> , 2015 | B-Analyst         | Arkray HA-8180           | Venous               | Tertiary hospital or research center | 0.187     | -0.230, 0.600 | Not reported          | (26)           |
| Criel <i>et al</i> , 2016               | Afinion           | Arkray HA-8160           | Not reported         | General hospital                     | -0.201    | -0.851, 0.439 | Industrial            | (11)           |
| Criel <i>et al</i> , 2016               | Cobas b101        | Arkray HA-8160           | Not reported         | General hospital                     | -0.201    | -0.622, 0.220 | Industrial            | (11)           |
| Criel <i>et al</i> , 2016               | B-Analyst         | Arkray HA-8160           | Not reported         | General hospital                     | 0.046     | -0.183, 0.275 | Industrial            | (11)           |
| Grant <i>et al</i> , 2017               | Quo-Test          | BioRad D10               | Not reported         | Not reported                         | 0.128     | -0.458, 0.714 | Not reported          | (12)           |
| Wang <i>et al</i> , 2018                | A1C EZ2.0         | Trinity Premier Hb9210   | Not reported         | Tertiary hospital or research center | 0.020     | -0.570, 0.610 | Institutional         | (27)           |
| Wang <i>et al</i> , 2018                | A1C EZ2.0         | Tosoh G8                 | Not reported         | Tertiary hospital or research center | 0.040     | -0.570, 0.660 | Institutional         | (27)           |
| Wang <i>et al</i> , 2018                | A1C EZ 2.0        | BioRad variant II        | Not reported         | Tertiary hospital or research center | 0.170     | -0.520, 0.850 | Institutional         | (27)           |
| Dupuy <i>et al</i> , 2019               | Cobas b101        | Tosoh G8                 | Not reported         | Not reported                         | -0.090    | -0.630, 0.450 | Not reported          | (28)           |
| Dubach <i>et al</i> , 2019              | Afinion           | Tosoh G8                 | Venous               | Tertiary hospital or research center | -0.265    | -0.833, 0.293 | Institutional         | (29)           |
| Dubach <i>et al</i> , 2019              | DCA               | Tosoh G8                 | Venous               | Tertiary hospital or research center | -0.210    | -0.714, 0.293 | Institutional         | (29)           |
| GuadalupeVargas <i>et al</i> , 2020     | DCA               | BioRad variant II        | Venous               | Tertiary hospital or research center | -0.020    | -0.600, 0.550 | Institutional         | (30)           |
| GuadalupeVargas <i>et al</i> , 2020     | i-Chroma          | BioRad variant II        | Venous               | Tertiary hospital or research center | -0.500    | -3.740, 2.740 | Institutional         | (30)           |
| Şahingöz Erdal <i>et al</i> , 2019      | Tri-stat POCT     | Trinity Premier Hb9210   | Venous               | Tertiary hospital or research center | -0.090    | -1.030, 0.850 | Not reported          | (31)           |
| Şahingöz Erdal <i>et al</i> , 2019      | Tri-stat POCT     | Trinity Premier Hb9210   | Capillary            | Tertiary hospital or research center | -0.060    | -1.010, 0.890 | Not reported          | (31)           |
| Toro-Crespo <i>et al</i> , 2017         | Afinion           | Tosoh G8                 | Not reported         | Not reported                         | 0.018     | -0.056, 0.092 | Not reported          | (32)           |

|                                 |                   |                        |              |                                      |       |               |               |      |
|---------------------------------|-------------------|------------------------|--------------|--------------------------------------|-------|---------------|---------------|------|
| Toro-Crespo <i>et al</i> , 2017 | B-Analyst         | Tosoh G8               | Not reported | Not reported                         | 0.124 | 0.085, 0.162  | Not reported  | (32) |
| Rathod <i>et al</i> , 2024      | HemoCue HbA1c 501 | Tosoh GX               | Venous       | Tertiary hospital or research center | 0.100 | -0.500, 0.700 | Institutional | (33) |
| Saxton <i>et al</i> , 2018      | DCA               | Trinity Premier Hb9210 | Venous       | Not reported                         | 0.320 | -0.050, 0.700 | Institutional | (34) |
| Saxton <i>et al</i> , 2018      | Afinion           | Trinity Premier Hb9210 | Venous       | Not reported                         | 0.560 | 0.160, 0.970  | Institutional | (34) |

Characteristic and numeric outcomes are summarized that support quantitative synthesis. For meta-analysis, all method comparison metrics were harmonized to a common effect size defined as the mean difference (POC - HPLC) in % HbA1c. If not directly reported, 95% LoA were calculated as the mean difference  $\pm 1.96 \times SD$ . When only the 95% CI for the mean difference was available, the SD was back-calculated using the assuming a normal distribution. Studies reporting only graphical Bland-Altman plots without extractable numerical data were excluded from quantitative synthesis. Studies that combined venous and capillary samples without separate reporting were classified under 'not reported' for the purpose of descriptive stratification. All POC devices were factory-calibrated using lot-specific code cards or chips. POC, point-of-care; MD, mean difference; LoA, limits of agreement; HPLC, high-performance liquid chromatography; HbA1c, hemoglobin A1c; SD, standard deviation; CI, confidence interval.

**Table SIV.** Summary of pooled mean differences and heterogeneity statistics across all subgroup analyses.

| Classification           | Subgroup                             | % HbA1c (NGSP) |              | mmol/mol (IFCC) |            | Heterogeneity statistics |          |                |                |
|--------------------------|--------------------------------------|----------------|--------------|-----------------|------------|--------------------------|----------|----------------|----------------|
|                          |                                      | MD             | 95% CI       | MD              | 95% CI     | Q                        | $\tau^2$ | I <sup>2</sup> | H <sup>2</sup> |
| POC device model         | i-Chroma                             | -0.50          | -0.80, -0.20 | -5.5            | -8.7, -2.2 | —                        | —        | —              | —              |
|                          | Afinion                              | 0.03           | -0.34, 0.40  | 0.3             | -3.7, 4.4  | 831.9                    | 0.14     | 99.39          | 163.70         |
|                          | DCA                                  | 0.03           | -0.27, 0.34  | 0.3             | -3, 3.7    | 392.1                    | 0.07     | 99.35          | 153.47         |
|                          | Cobas b101                           | -0.14          | -0.25, -0.03 | -1.5            | -2.7, -0.3 | 6.7                      | 0.01     | 85.04          | 6.69           |
|                          | Tri-stat POCT                        | -0.08          | -0.15, 0.00  | -0.9            | -1.6, 0    | 0.2                      | 0.00     | 0.00           | 1.00           |
|                          | A1C EZ 2.0                           | 0.08           | -0.02, 0.17  | 0.9             | -0.2, 1.9  | 60.9                     | 0.01     | 96.97          | 32.97          |
|                          | B-Analyst                            | 0.12           | 0.04, 0.20   | 1.3             | 0.4, 2.2   | 28.2                     | 0.01     | 92.72          | 13.74          |
|                          | HemoCue                              | 0.10           | 0.05, 0.15   | 1.1             | 0.5, 1.6   | —                        | —        | —              | —              |
|                          | Quo-Test                             | 0.13           | 0.07, 0.19   | 1.4             | 0.8, 2.1   | —                        | —        | —              | —              |
| POC analytical principle | Chromatographic immunoassay          | -0.50          | -0.8, -0.2   | -5.5            | -8.7, -2.2 | —                        | —        | —              | —              |
|                          | Boronate affinity chromatography     | 0.04           | -0.09, 0.17  | 0.4             | -1, 1.9    | 1195.3                   | 0.05     | 98.99          | 99.38          |
|                          | Non-chromatographic immunoassay      | 0.02           | -0.11, 0.15  | 0.2             | -1.2, 1.6  | 593.1                    | 0.03     | 98.73          | 78.54          |
| Specimen type            | Venous                               | 0.02           | -0.18, 0.22  | 0.2             | -2, 2.4    | 1279.6                   | 0.09     | 99.43          | 175.49         |
|                          | Capillary                            | -0.06          | -0.17, 0.05  | -0.7            | -1.9, 0.5  | —                        | —        | —              | —              |
|                          | Not reported                         | 0.01           | -0.07, 0.09  | 0.1             | -0.8, 1.0  | 194.4                    | 0.02     | 97.33          | 37.45          |
| HPLC principle           | Ion-exchange chromatography          | -0.03          | -0.12, 0.06  | -0.3            | -1.3, 0.7  | 482.6                    | 0.03     | 97.97          | 49.20          |
|                          | Boronate-affinity HPLC               | 0.15           | -0.09, 0.4   | 1.6             | -1, 4.4    | 815.2                    | 0.08     | 99.54          | 219.33         |
| Exclusion of variants    | Excluded                             | 0.00           | -0.1, 0.11   | 0.0             | -1.1, 1.2  | 135.8                    | 0.02     | 97.77          | 44.89          |
|                          | Not reported                         | 0.03           | -0.11, 0.17  | 0.3             | -1.2, 1.9  | 1583.4                   | 0.06     | 99.12          | 113.06         |
| Study setting            | Tertiary hospital or research center | -0.04          | -0.14, 0.07  | -0.4            | -1.5, 0.8  | 370.0                    | 0.03     | 98.26          | 57.40          |
|                          | General hospital                     | 0.05           | 0.01, 0.08   | 0.5             | 0.1, 0.9   | 53.0                     | 0.02     | 94.98          | 19.91          |
|                          | Not reported                         | 0.18           | -0.01, 0.36  | 2.0             | -0.1, 3.9  | 686.6                    | 0.05     | 99.22          | 129.01         |
| Risk of study            | High                                 | -0.02          | -0.12, 0.08  | -0.2            | -1.3, 0.9  | 152.2                    | 0.02     | 95.96          | 24.73          |
|                          | Low                                  | 0.10           | -0.07, 0.26  | 1.1             | -0.8, 2.8  | 1462.8                   | 0.06     | 99.51          | 202.76         |
|                          | Unclear                              | -0.16          | -0.41, 0.08  | -1.7            | -4.5, 0.9  | 11.5                     | 0.04     | 96.77          | 30.97          |
| Funding source           | Industrial                           | -0.11          | -0.28, 0.05  | -1.2            | -3.1, 0.5  | 53.0                     | 0.02     | 94.98          | 19.91          |

|               |      |             |     |           |        |      |       |        |
|---------------|------|-------------|-----|-----------|--------|------|-------|--------|
| Institutional | 0.03 | -0.14, 0.21 | 0.3 | -1.5, 2.3 | 1522.0 | 0.08 | 99.57 | 231.47 |
| Not reported  | 0.04 | -0.06, 0.14 | 0.3 | -1.5, 2.3 | 94.9   | 0.02 | 95.05 | 20.20  |

Values are reported as %HbA1c and converted to mmol/mol using the IFCC-NGSP master equation. Random-effects pooling was performed using REML with Knapp-Hartung adjustment. Heterogeneity indices ( $Q$ ,  $\tau^2$ ,  $I^2$ ,  $H^2$ ) are presented for subgroups with more than one comparison; subgroups represented by a single comparison have non-estimable heterogeneity ( $I^2$ ,  $\tau^2$ ), shown as “—”. “Not reported” reflects missing moderator information without inferential interpretation. HbA1c, hemoglobin A1c; NGSP, National Glycohemoglobin Standardization Program; IFCC, International Federation of Clinical Chemistry and Laboratory Medicine; POC, point-of-care; MD, mean difference; CI, confidence interval; HPLC, high-performance liquid chromatography.

**Table SV.** Univariable random-effects meta-regression (REML, Knapp-Hartung adjustment).

| <b>Moderator</b>          | <b>k</b> | <b>R<sup>2</sup></b> | <b>p</b> | <b>Interpretation</b>                                                    |
|---------------------------|----------|----------------------|----------|--------------------------------------------------------------------------|
| POC analytical principle  | 20       | 6.4%                 | 0.15     | Small explanatory contribution; weak positive trend for immunoassay.     |
| Specimen type             | 20       | 0%                   | 0.93     | Venous/capillary differences, no explanation.                            |
| Setting                   | 20       | 20.6%                | 0.067    | Decentralized settings tended toward greater positive bias (borderline). |
| Study-level risk of bias  | 20       | 4.9%                 | 0.20     | Minimal explanatory value; association not significant.                  |
| Variant exclusion         | 20       | 0%                   | 0.71     | No explanatory value; exclusion reporting had no impact.                 |
| Funding source            | 20       | 0%                   | 0.56     | No explanatory contribution.                                             |
| POCmodel                  | 20       | 0%                   | 0.66     | No meaningful discrimination between devices                             |
| HPLC analytical principle | 20       | 11.2%                | 0.10     | Weak positive trend for boronate-based HPLC systems (borderline).        |

Meta-regression models were fitted using random-effects REML estimation with Knapp-Hartung adjustments. Each moderator was evaluated in a separate univariable model. Residual heterogeneity remained significant in every model ( $Q_{res} p < 0.001$ ), indicating that none of the tested moderators accounted for the extreme between-study dispersion.  $R^2$  represents the proportion of between-study variance explained by the moderator. “p” refers to the omnibus model test. REML, restricted maximum likelihood; POC, point-of-care; HPLC, high-performance liquid chromatography.

**Table SVI.** Leave-one-out influence analysis.

| Removed comparison                                                                     | $\theta$ (%) | 95% CI          | $\tau^2$ | Q      | I <sup>2</sup> (%) | P-value | (Refs.) |
|----------------------------------------------------------------------------------------|--------------|-----------------|----------|--------|--------------------|---------|---------|
| Menéndez-Valladares <i>et al</i> , 2015 (i-Chroma, BioRad variant II)                  | 0.032        | -0.065 to 0.129 | 0.0398   | 1794.5 | 98.88              | 0.493   | (26)    |
| Dubach <i>et al</i> , 2019 (Afinion, Tosoh G8)                                         | 0.030        | -0.075 to 0.134 | 0.0424   | 1622.5 | 98.92              | 0.559   | (29)    |
| Dubach <i>et al</i> , 2019 (DCA, Tosoh G8)                                             | 0.026        | -0.080 to 0.132 | 0.0443   | 1636.0 | 98.95              | 0.609   | (29)    |
| Criel <i>et al</i> , 2016 (Afinion, Arkray HA-8160)                                    | 0.025        | -0.081 to 0.132 | 0.0447   | 1771.6 | 99.00              | 0.625   | (11)    |
| Criel <i>et al</i> , 2016(Cobas b101, Arkray HA-8160)                                  | 0.026        | -0.081 to 0.132 | 0.0446   | 1717.8 | 98.98              | 0.619   | (11)    |
| Dupuy <i>et al</i> , 2019 (Cobas b101, Tosoh G8)                                       | 0.019        | -0.089 to 0.128 | 0.0470   | 1742.7 | 99.02              | 0.713   | (28)    |
| Şahingöz Erdal <i>et al</i> , 2019(Tri-stat POCT, Trinity Premier Hb9210) (venous)     | 0.019        | -0.090 to 0.128 | 0.0469   | 1795.4 | 99.04              | 0.717   | (31)    |
| Şahingöz Erdal <i>et al</i> , 2019 (Tri-stat POCT, Trinity Premier Hb9210) (capillary) | 0.017        | -0.092 to 0.127 | 0.0472   | 1799.7 | 99.05              | 0.740   | (31)    |
| GuadalupeVargas <i>et al</i> , 2020 (DCA, BioRad variant II)                           | 0.015        | -0.094 to 0.125 | 0.0476   | 1782.8 | 99.03              | 0.770   | (30)    |
| Toro-Crespo <i>et al</i> , 2017(Afinion, Tosoh G8)                                     | 0.013        | -0.096 to 0.123 | 0.0477   | 1802.8 | 99.05              | 0.800   | (32)    |
| Wang <i>et al</i> , 2018 (A1C EZ2.0, Trinity Premier Hb9210)                           | 0.013        | -0.096 to 0.123 | 0.0478   | 1741.5 | 98.93              | 0.802   | (27)    |
| Wang <i>et al</i> , 2018 (A1C EZ2.0, Tosoh G8)                                         | 0.012        | -0.097 to 0.122 | 0.0478   | 1769.8 | 98.94              | 0.818   | (27)    |
| Criel <i>et al</i> , 2016 (B-Analyst, Arkray HA-8160)                                  | 0.012        | -0.098 to 0.121 | 0.0477   | 1791.9 | 98.99              | 0.822   | (11)    |
| Rathod <i>et al</i> , 2024(HemoCue HbA1c 501, Tosoh GX)                                | 0.009        | -0.100 to 0.118 | 0.0474   | 1810.0 | 99.03              | 0.864   | (33)    |
| Toro-Crespo <i>et al</i> , 2017(B-Analyst, Tosoh G8)                                   | 0.008        | -0.101 to 0.116 | 0.0471   | 1810.7 | 98.99              | 0.883   | (32)    |
| Grant <i>et al</i> , 2017(Quo-Test, BioRad D10)                                        | 0.008        | -0.101 to 0.116 | 0.0470   | 1810.7 | 99.03              | 0.885   | (12)    |
| Wang <i>et al</i> , 2018 (A1C EZ 2.0, BioRad variant II)                               | 0.005        | -0.103 to 0.113 | 0.0463   | 1800.5 | 98.93              | 0.918   | (27)    |
| Menéndez-Valladares <i>et al</i> , 2015 (B-Analyst, Arkray HA-8180)                    | 0.005        | -0.103 to 0.112 | 0.0460   | 1799.1 | 98.96              | 0.931   | (26)    |
| Saxton <i>et al</i> , 2018 (DCA, Trinity Premier Hb9210)                               | -0.002       | -0.105 to 0.101 | 0.0419   | 1564.5 | 98.78              | 0.967   | (34)    |
| Saxton <i>et al</i> , 2018(Afinion, Trinity Premier Hb9210)                            | -0.012       | -0.099 to 0.075 | 0.0282   | 881.7  | 98.25              | 0.773   | (34)    |
| Full model (no removal)                                                                | 0.014        | -0.089 to 0.117 | 0.0449   | 1810.7 | 98.96              | 0.779   | -       |

Leave-one-out influence diagnostics were performed under a random-effects REML model with Knapp-Hartung adjustment. Each row represents the updated pooled estimate after removing one device-specific comparison. All estimates remained directionally consistent, and no single comparison materially shifted the pooled mean difference or heterogeneity metrics, indicating minimal influence of individual studies. CI, confidence interval;REML, restricted maximum likelihood.
